# Supplementary material
Source: Springer Nature journal article supplement (https://www.springermedizin.de/resource/supplementary/12967_2011_830_MOESM3_ESM.pdf/9577144)
Supplement: MOESM3 [file 9577144]

% patients alive without amputation

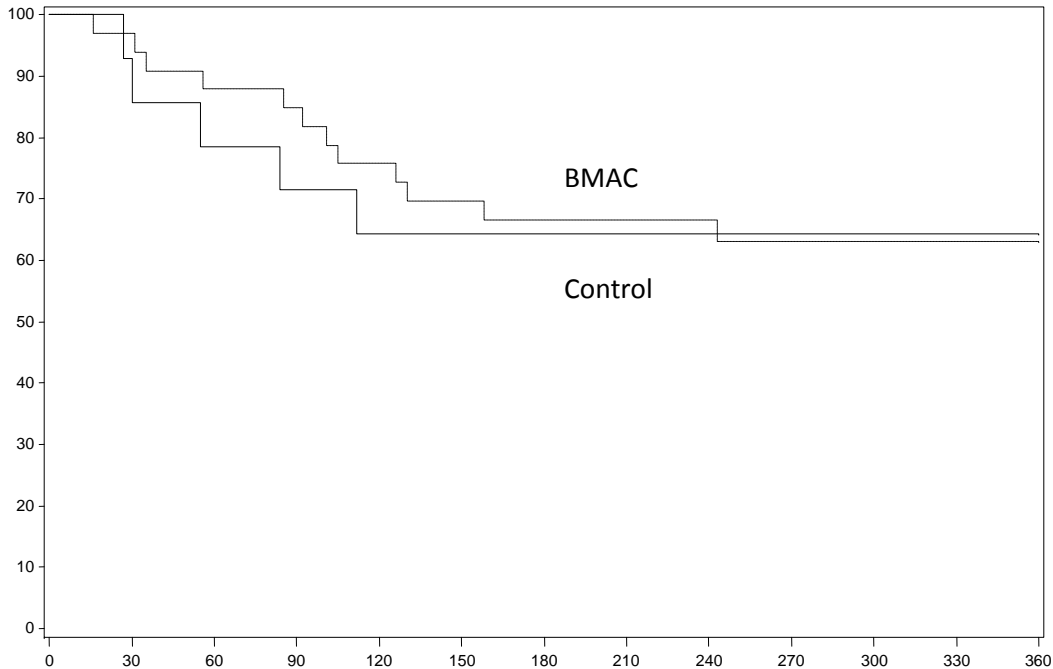

Amputation Free Survival over 1 Yr, BMAC vs. Control (Days)

— Placebo — BMAC
